# Supplementary material
Source: HighWire-hosted journal article supplement (https://erj.ersjournals.com/content/54/4/1901639)
Supplement: inline-supplementary-material-1 [file inline-supplementary-material-1.pdf]

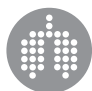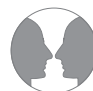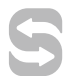

SHAREABLE PDF

# Balloon pulmonary angioplasty for the treatment of chronic thromboembolic pulmonary hypertension: is Europe behind?

Irene M. Lang<sup>1</sup> and Hiromi Matsubara<sup>2</sup>

**Affiliations:** <sup>1</sup>Dept of Internal Medicine II, Division of Cardiology, Vienna General Hospital, Medical University of Vienna, Vienna, Austria. <sup>2</sup>National Hospital Organization, Okayama Medical Center, Okayama, Japan.

**Correspondence:** Irene M. Lang, Dept of Internal Medicine II, Division of Cardiology, Medical University of Vienna, Währinger Gürtel 18–20, 1090 Vienna, Austria. E-mail: irene.lang@meduniwien.ac.at

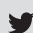

@ERSpublications

**Balloon pulmonary angioplasty is gaining ground in Europe**

<http://bit.ly/2m02zXF>

**Cite this article as:** Lang IM, Matsubara H. Balloon pulmonary angioplasty for the treatment of chronic thromboembolic pulmonary hypertension: is Europe behind?. *Eur Respir J* 2019; 54: 1901639 [<https://doi.org/10.1183/13993003.01639-2019>].

This single-page version can be shared freely online.

## From the authors:

We are grateful to the editors to be able to correct an error in the table (the number for lung injury referred to % of sessions) and one in the text (“billion” has been corrected to “million”) of our editorial [1] accompanying the article by BRENOT *et al.* [2], published recently in the *European Respiratory Journal*. These errors have been corrected in the revised version of the table in the editorial; also see the author correction notice in this issue of the *European Respiratory Journal*.
